# Supplementary material
Source: publisher figshare collection journal article supplement (https://acs.figshare.com/ndownloader/files/4599202)
Supplement: Supplementary file 1 [file 4599202]

## Simulation protocol

All simulations were performed using gromacs version 3.3 ([www.gromacs.org](http://www.gromacs.org)).<sup>1</sup> The GROMOS96 (43a2) united-atom force field and the simple point charge (SPC) water model were used.<sup>2, 3</sup> dipalmitoyl-phosphatidylcholin (DPPC) and dimyristoyl-phosphatidylcholine (DMPC) lipid parameters were taken from.<sup>4</sup> An electrostatic twin-range cut-off of 10/14 Å were used and hydrogen-bonds were restrained using LINCS.<sup>5</sup> Simulations were run with a 2 fs integration time-step and neighbor lists were updated every 5 steps. SPC, DPPC, and protein were each coupled separately to a heat bath with a temperature of 353 K and time constant  $\tau_T = 0.1$  ps using weak temperature coupling.<sup>6</sup> Simulations at a lower temperature of 323 K led to a gel-like phase of the bilayer, with the increased ordering of the lipids inhibiting the sampling required for folding. Atmospheric pressure of 1 bar was maintained using weak semi-isotropic pressure coupling with compressibility  $\kappa_z = \kappa_{xy} = 4.6 \cdot 10^{-5} \text{ bar}^{-1}$  and time constant  $\tau_p = 1$  ps.

- (1) Berendsen, H. J. C.; van der Spoel, D.; van Drunen, R., *Comp. Phys. Comm.* **1995**, 95, 43.
- (2) van Gunsteren, W. F.; Kruger, P.; Billeter, S. R.; Mark, A. E.; Eising, A. A.; Scott, W. R. P.; Huneberger, P. H.; Tironi, I. G., *Biomolecular Simulation: The GROMOS96 Manual and User Guide*. Biomos & Hochschulverlag AG an der ETH Zurich: Groningen & Zurich, 1996.
- (3) Berendsen, H. J. C.; Postma, J. P. M.; van Gunsteren, W. F.; Hermans, J., *Intermolecular Forces*. Reidel: Dordrecht, 1981.
- (4) Berger, O.; Edholm, O.; Jahnig, F., *Biophys. J.* **1997**, 72, 2002.
- (5) Hess, B.; Bekker, H.; Berendsen, H. J. C.; Fraaije, J. G. E. M., *J. Comp. Chem.* **1997**, 18, 1463.
- (6) Berendsen, H. J. C.; Postma, J. P. M.; van Gunsteren, W. F.; DiNola, A.; Haak, J. R., *J. Chem. Phys.* **1984**, 81, 3684.
